# Supplementary material for: Cognitive therapy as an early treatment for post‐traumatic stress disorder in children and adolescents: a randomized controlled trial addressing preliminary efficacy and mechanisms of action
Source: PubMed Central journal article supplement (PMC5362068; doi:10.1111/jcpp.12673), 2016-12-15
Supplement: NIHMS70479-supplement-Figure.pdf [file NIHMS70479-supplement-Figure.pdf]

## Supplementary Figure 1. Putative mediation pathways.

- a. Pre-post change in putative mediator variables as mediator between allocation and pre-post change in PTSD severity

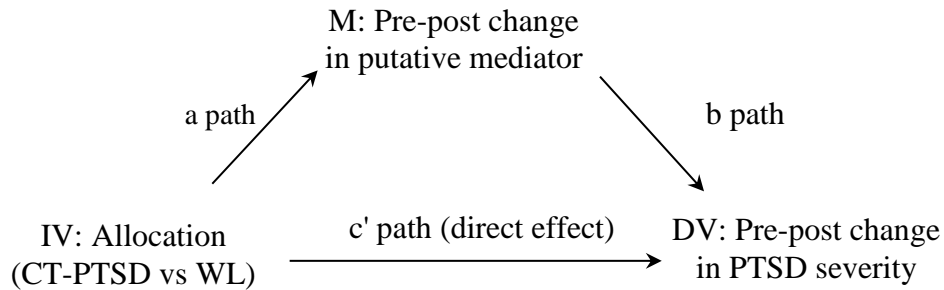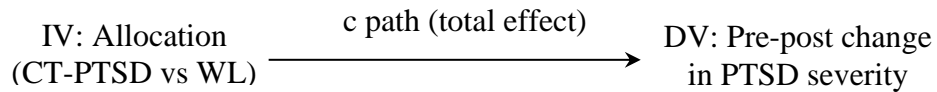

- b. Pre-mid change in putative mediator variables as mediator between allocation and PTSD severity at post-treatment

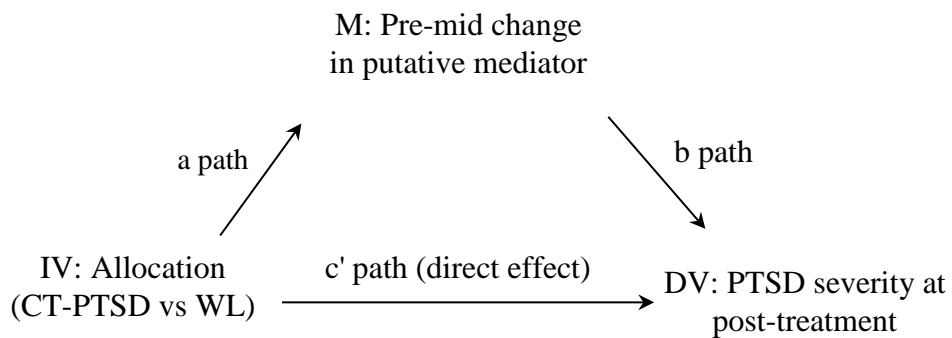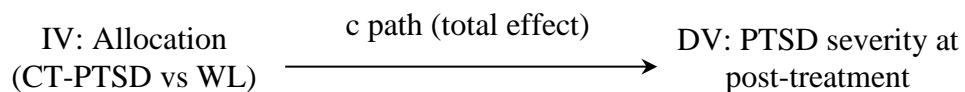

Note. IV = Independent Variable; M = Mediator; DV = dependent variable.
