# Supplementary material for: Cognitive therapy as an early treatment for post‐traumatic stress disorder in children and adolescents: a randomized controlled trial addressing preliminary efficacy and mechanisms of action
Source: PubMed Central journal article supplement (PMC5362068; doi:10.1111/jcpp.12673), 2016-12-15
Supplement: NIHMS70479-supplement-Tables.pdf [file NIHMS70479-supplement-Tables.pdf]

Supplementary Table 1. Scores on outcome measures at post-treatment and follow up based on multiple imputation.

| Outcome variable                                        | WL   |      |    | CT-PTSD |      |    | Group effect <sup>a</sup>     |
|---------------------------------------------------------|------|------|----|---------|------|----|-------------------------------|
|                                                         | M    | SD   | N  | M       | SD   | N  |                               |
| PTSD symptoms (CPTSDI)                                  |      |      |    |         |      |    |                               |
| Post                                                    | 10.1 | 4.0  | 15 | 2.6     | 3.4  | 14 | $F_{1,26} = 26.05, p < .0001$ |
| 6MFU                                                    | -    | -    | -  | 1.6     | 2.5  | 14 | -                             |
| 12MFU                                                   | -    | -    | -  | 2.2     | 3.5  | 14 | -                             |
| PTSD severity (CPSS)                                    |      |      |    |         |      |    |                               |
| Post                                                    | 22.9 | 15.4 | 15 | 6.8     | 10.3 | 14 | $F_{1,26} = 17.69, p < .0005$ |
| 6MFU                                                    | -    | -    | -  | 5.3     | 8.2  | 14 | -                             |
| 12MFU                                                   | -    | -    | -  | 5.8     | 6.0  | 14 | -                             |
| Depression (MFQ)                                        |      |      |    |         |      |    |                               |
| Post                                                    | 25.7 | 20.1 | 15 | 11.3    | 13.5 | 14 | $F_{1,26} = 4.59, p < .05$    |
| 6MFU                                                    | -    | -    | -  | 11.7    | 10.6 | 14 | -                             |
| 12MFU                                                   | -    | -    | -  | 8.5     | 7.0  | 14 | -                             |
| Anxiety (SCAS)                                          |      |      |    |         |      |    |                               |
| Post                                                    | 48.4 | 32.1 | 15 | 20.4    | 17.6 | 14 | $F_{1,26} = 8.59, p < .007$   |
| 6MFU                                                    | -    | -    | -  | 17.0    | 15.1 | 14 | -                             |
| 12MFU                                                   | -    | -    | -  | 14.8    | 9.9  | 14 | -                             |
| Functioning (CGAS) <sup>b</sup>                         | 55.7 | 13.4 | 15 | 77.1    | 13.7 | 14 | $F_{1,26} = 14.66, p < .0008$ |
| Parent-report emotional difficulties (SDQ) <sup>b</sup> | 6.1  | 3.3  | 15 | 3.3     | 2.0  | 14 | $F_{1,26} = 6.91, p < .02$    |
| Parent-report conduct problems (SDQ) <sup>b</sup>       | 4.4  | 2.4  | 15 | 1.9     | 1.6  | 14 | $F_{1,26} = 6.05, p < .03$    |
| Parent-report hyperactivity (SDQ) <sup>b</sup>          | 6.5  | 2.2  | 15 | 3.1     | 2.2  | 14 | $F_{1,26} = 16.01, p < .0005$ |

Note. WL = wait list; CT-PTSD = Cognitive Therapy for PTSD; Post = post-CT-PTSD/WL (week 11); 6MFU = six month follow-up; 12MFU = 12 month follow up; CPTSDI = Children's PTSD Inventory; CPSS = Child PTSD Symptom Scale; MFQ = Mood and Feelings Questionnaire; SCAS = Spence Child Anxiety Scale; CGAS = Clinician's Global Assessment Scale; SDQ = Strengths and Difficulties Questionnaire.

<sup>a</sup> All analyses are ANCOVA, with pre-treatment scores as covariates. <sup>b</sup> Post-treatment only.

Supplementary Table 2. Mediator measures for completers at each assessment.

| Outcome variable              | WL   |      |    | CT-PTSD |      |    | Group effect <sup>a</sup>     |
|-------------------------------|------|------|----|---------|------|----|-------------------------------|
|                               | M    | SD   | N  | M       | SD   | N  |                               |
| <b>Misappraisals (CPTCI)</b>  |      |      |    |         |      |    |                               |
| Pre                           | 64.6 | 22.8 | 15 | 60.5    | 15.8 | 14 | $F_{(1,28)} = .30, p=.59$     |
| Mid                           | 60.6 | 27.7 | 15 | 46.1    | 19.6 | 13 | $F_{(1,27)} = 2.09, p=.16$    |
| Post                          | 62.9 | 27.6 | 13 | 38.9    | 15.5 | 13 | $F_{(1,25)} = 7.57, p<.02$    |
| <b>Memory quality (TMQQ)</b>  |      |      |    |         |      |    |                               |
| Pre                           | 32.8 | 4.6  | 15 | 33.7    | 4.3  | 14 | $F_{(1,28)} = .30, p=.59$     |
| Mid                           | 28.5 | 8.7  | 15 | 27.9    | 7.1  | 13 | $F_{(1,27)} = .15, p=.70$     |
| Post                          | 30.8 | 7.9  | 13 | 21.7    | 4.9  | 13 | $F_{(1,25)} = 14.29, p<.001$  |
| <b>Rumination</b>             |      |      |    |         |      |    |                               |
| Pre                           | 9.5  | 2.5  | 15 | 10.2    | 1.6  | 14 | $F_{(1,28)} = .90, p=.35$     |
| Mid                           | 10.0 | 2.4  | 15 | 8.8     | 2.7  | 13 | $F_{(1,27)} = 1.95, p=.18$    |
| Post                          | 10.0 | 1.6  | 13 | 6.7     | 2.7  | 13 | $F_{(1,25)} = 21.39, p<.0001$ |
| <b>Safety-seeking behavs</b>  |      |      |    |         |      |    |                               |
| Pre                           | 36.3 | 17.2 | 15 | 34.3    | 14.2 | 14 | $F_{(1,28)} = .12, p=.74$     |
| Mid                           | 36.0 | 21.5 | 15 | 23.1    | 13.7 | 13 | $F_{(1,27)} = 3.47, p=.07$    |
| Post                          | 35.2 | 20.3 | 13 | 18.5    | 15.1 | 13 | $F_{(1,25)} = 5.68, p<.03$    |
| <b>Self-blame</b>             |      |      |    |         |      |    |                               |
| Pre                           | 4.2  | 2.5  | 15 | 3.1     | 1.6  | 14 | $F_{(1,28)} = 1.88, p=.18$    |
| Mid                           | 3.9  | 2.4  | 15 | 2.6     | 1.2  | 13 | $F_{(1,27)} = 1.51, p=.23$    |
| Post                          | 4.0  | 2.7  | 13 | 2.8     | 1.5  | 13 | $F_{(1,25)} = .29, p=.60$     |
| <b>Social support (MSPSS)</b> |      |      |    |         |      |    |                               |
| Pre                           | 62.9 | 19.5 | 15 | 65.0    | 13.2 | 14 | $F_{(1,28)} = .12, p=.73$     |
| Post                          | 69.5 | 12.6 | 13 | 67.5    | 16.1 | 13 | $F_{(1,25)} = .32, p=.58$     |

Note. <sup>a</sup> At pre-treatment, one-way analysis of variance; at mid- and post-treatment, one-way analysis of covariance with pre-treatment scores as covariates. WL = wait list; CT-PTSD = Cognitive Therapy for PTSD; Pre = pre-treatment (i.e. at randomisation); Mid = five weeks post-randomisation; Post = post-CT-PTSD/WL (week 11); CPTCI = Child Post-Traumatic Cognitions Inventory; TMQQ = Trauma Memory Quality Questionnaire; MSPSS = Multidimensional Scale of Perceived Social Support.

Supplementary Table 3. Mediators of treatment responsiveness.

| Mediator                                                                                                                                                                 | a path  | b path  | c path    | c' path   | Indirect effect (c - c') | 95% CI of indirect effect | R <sup>2</sup> |
|--------------------------------------------------------------------------------------------------------------------------------------------------------------------------|---------|---------|-----------|-----------|--------------------------|---------------------------|----------------|
| <i>Analysis 1: Mediators of relationship between trial allocation and pre-post change in PTSD severity (CPSS) – the role of pre-post changes in cognitive mechanisms</i> |         |         |           |           |                          |                           |                |
| Misappraisals                                                                                                                                                            |         |         |           |           |                          |                           |                |
| Δ Misappraisals (CPTCI)                                                                                                                                                  | 20.18** | .40**   | 16.75***  | 8.67*     | 8.09                     | (2.57, 17.02)             | .66            |
| Memory quality                                                                                                                                                           |         |         |           |           |                          |                           |                |
| Δ Memory Quality (TMQQ)                                                                                                                                                  | 8.68*** | 1.31*** | 17.20***  | 5.86      | 11.34                    | (5.16, 29.51)             | .66            |
| Dysfunctional coping                                                                                                                                                     |         |         |           |           |                          |                           |                |
| Δ Rumination                                                                                                                                                             | 3.46*** | 2.61*   | 17.30***  | 8.26      | 9.04                     | (2.97, 18.29)             | .54            |
| Δ Safety-seeking behav.                                                                                                                                                  | 12.58*  | .52**   | 15.06***  | 8.55      | 6.51                     | (2.04, 15.00)             | .74            |
| <i>Analysis 2: Mediators of relationship between allocation and PTSD severity (CPSS) at post-treatment – the role of pre-mid changes in cognitive mechanisms.</i>        |         |         |           |           |                          |                           |                |
| Misappraisals                                                                                                                                                            |         |         |           |           |                          |                           |                |
| Δ Misappraisals (CPTCI)                                                                                                                                                  | 12.20   | -.42*** | -16.75*** | -11.57**  | -5.18                    | (-12.63, -.25)            | .80            |
| Memory quality                                                                                                                                                           |         |         |           |           |                          |                           |                |
| Δ Memory Quality (TMQQ)                                                                                                                                                  | .06     | -.35    | -17.20*** | -17.18*** | -.02                     | (-2.82, 4.01)             | .62            |
| Dysfunctional coping                                                                                                                                                     |         |         |           |           |                          |                           |                |
| Δ Rumination                                                                                                                                                             | 1.27    | -2.42** | -17.30*** | -14.23*** | -3.07                    | (-10.21, .27)             | .74            |
| Δ Safety-seeking behav.                                                                                                                                                  | 9.78    | -.37*   | -15.06*** | -11.46**  | -3.60                    | (-13.00, -.10)            | .77            |

Note. a path = independent variable (IV; allocation) to mediator; b path = direct effect of mediator on dependent variable (DV; pre-post change in CPSS or CPSS at post-treatment); c path = total effect of IV on DV; c' path = direct effect of IV on DV; CPTCI = Child Post-Traumatic Cognitions Inventory; TMQQ = Trauma Memory Quality Questionnaire. Pre-treatment symptom counts and corresponding mediator scores were entered as covariates into each model. Mediation is indicated where the 95% confidence intervals of the indirect effect do not cross zero.

\* = p<.05; \*\* = p<.01; \*\*\* = p<.001.
